# Supplementary material
Source: Springer Nature journal article supplement (http://www.springermedizin.de/resource/supplementary/12955_2005_236_MOESM1_ESM.pdf/9559990)

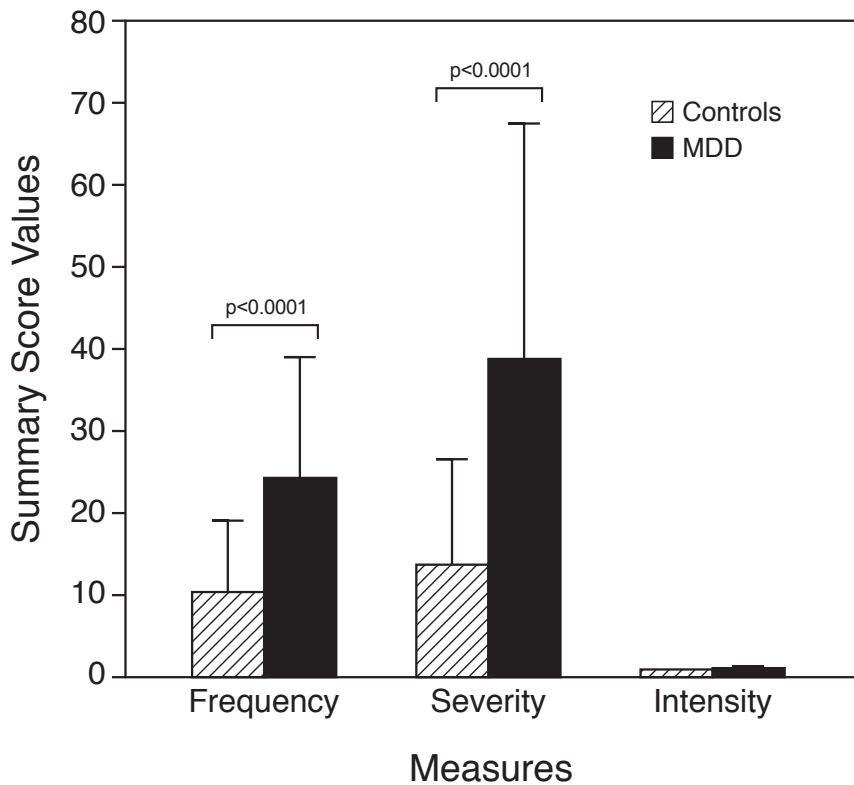

Supplement: MOESM1 [file 9559990]
